# Supplementary material for: Optogenetically Induced Microtubule Acetylation Unveils the Molecular Dynamics of Actin-Microtubule Crosstalk in Directed Cell Migration
Source: PubMed Central journal article supplement — bioRxiv. 2024 Dec 2:2024.12.01.626286. Preprint. [Version 1] doi: 10.1101/2024.12.01.626286 (PMC11642777; doi:10.1101/2024.12.01.626286), 2024-12-02
Supplement: NIHPP2024.12.01.626286V1-supplement-1.pdf [file NIHPP2024.12.01.626286V1-supplement-1.pdf]

# Supplementary Figure 1

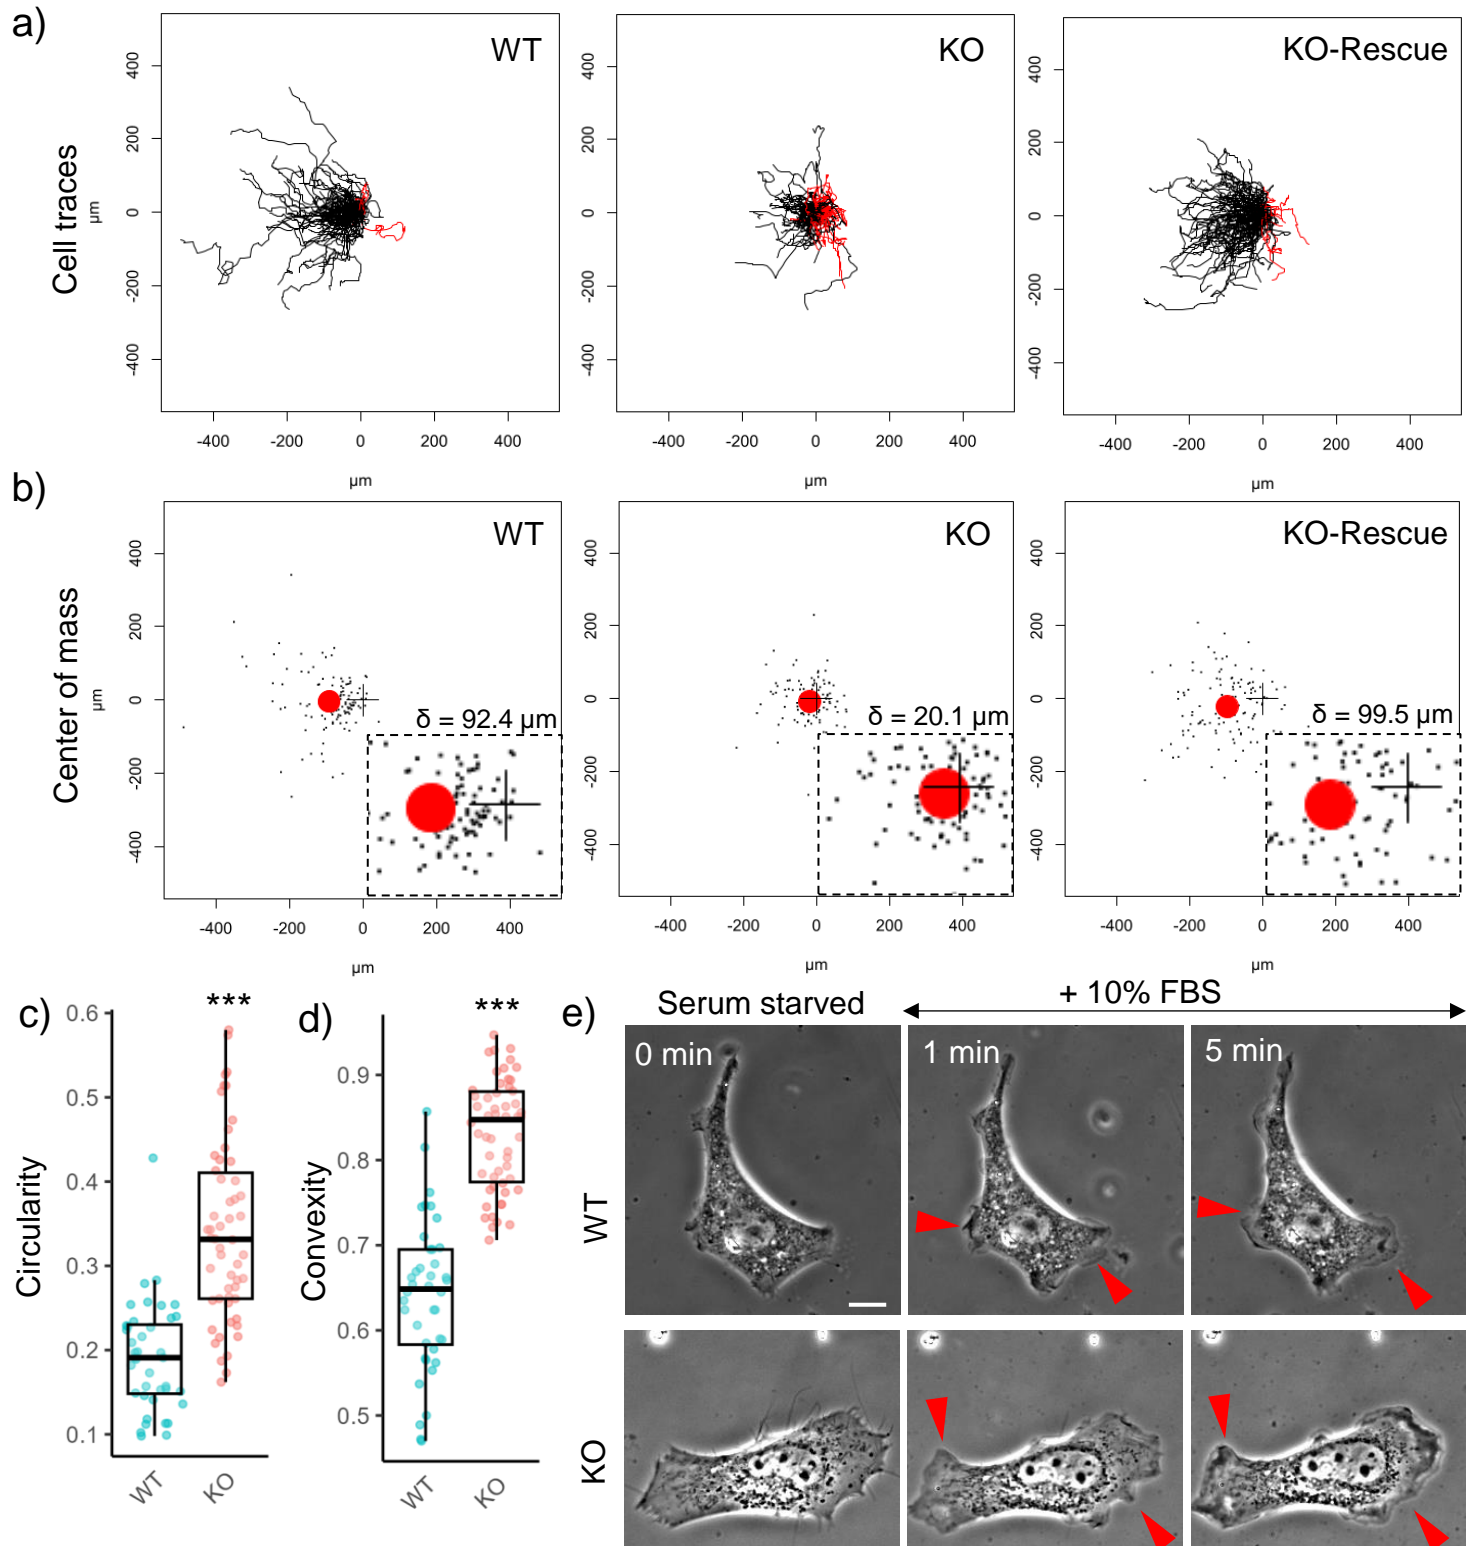

**Supplementary Figure S1.** a) Tracks of WT,  $\alpha$ -TAT1 KO and KO-rescue with  $\alpha$ -TAT1 MEFs in chemotaxis assay,  $n = 120$  cells (40 each from three independent experiments); b) Final location of individual cells (black dots) and the center of mass of all the cells (red circle) in chemotaxis assay, origin is indicated by “+”, distance between origin and center of mass ( $\delta$ ) is shown above the inset; c) Circularity and d) Convexity of WT  $\alpha$ -TAT1 KO MEFs (WT: 40 and KO: 54 cells); e) Morphological changes in serum-starved WT and  $\alpha$ -TAT1 KO MEFs on addition of 10% FBS, induced protrusions are indicated with red arrowheads, scale bar: 10  $\mu$ m. \*\*\*:  $p < 0.001$

# Supplementary Figure 2

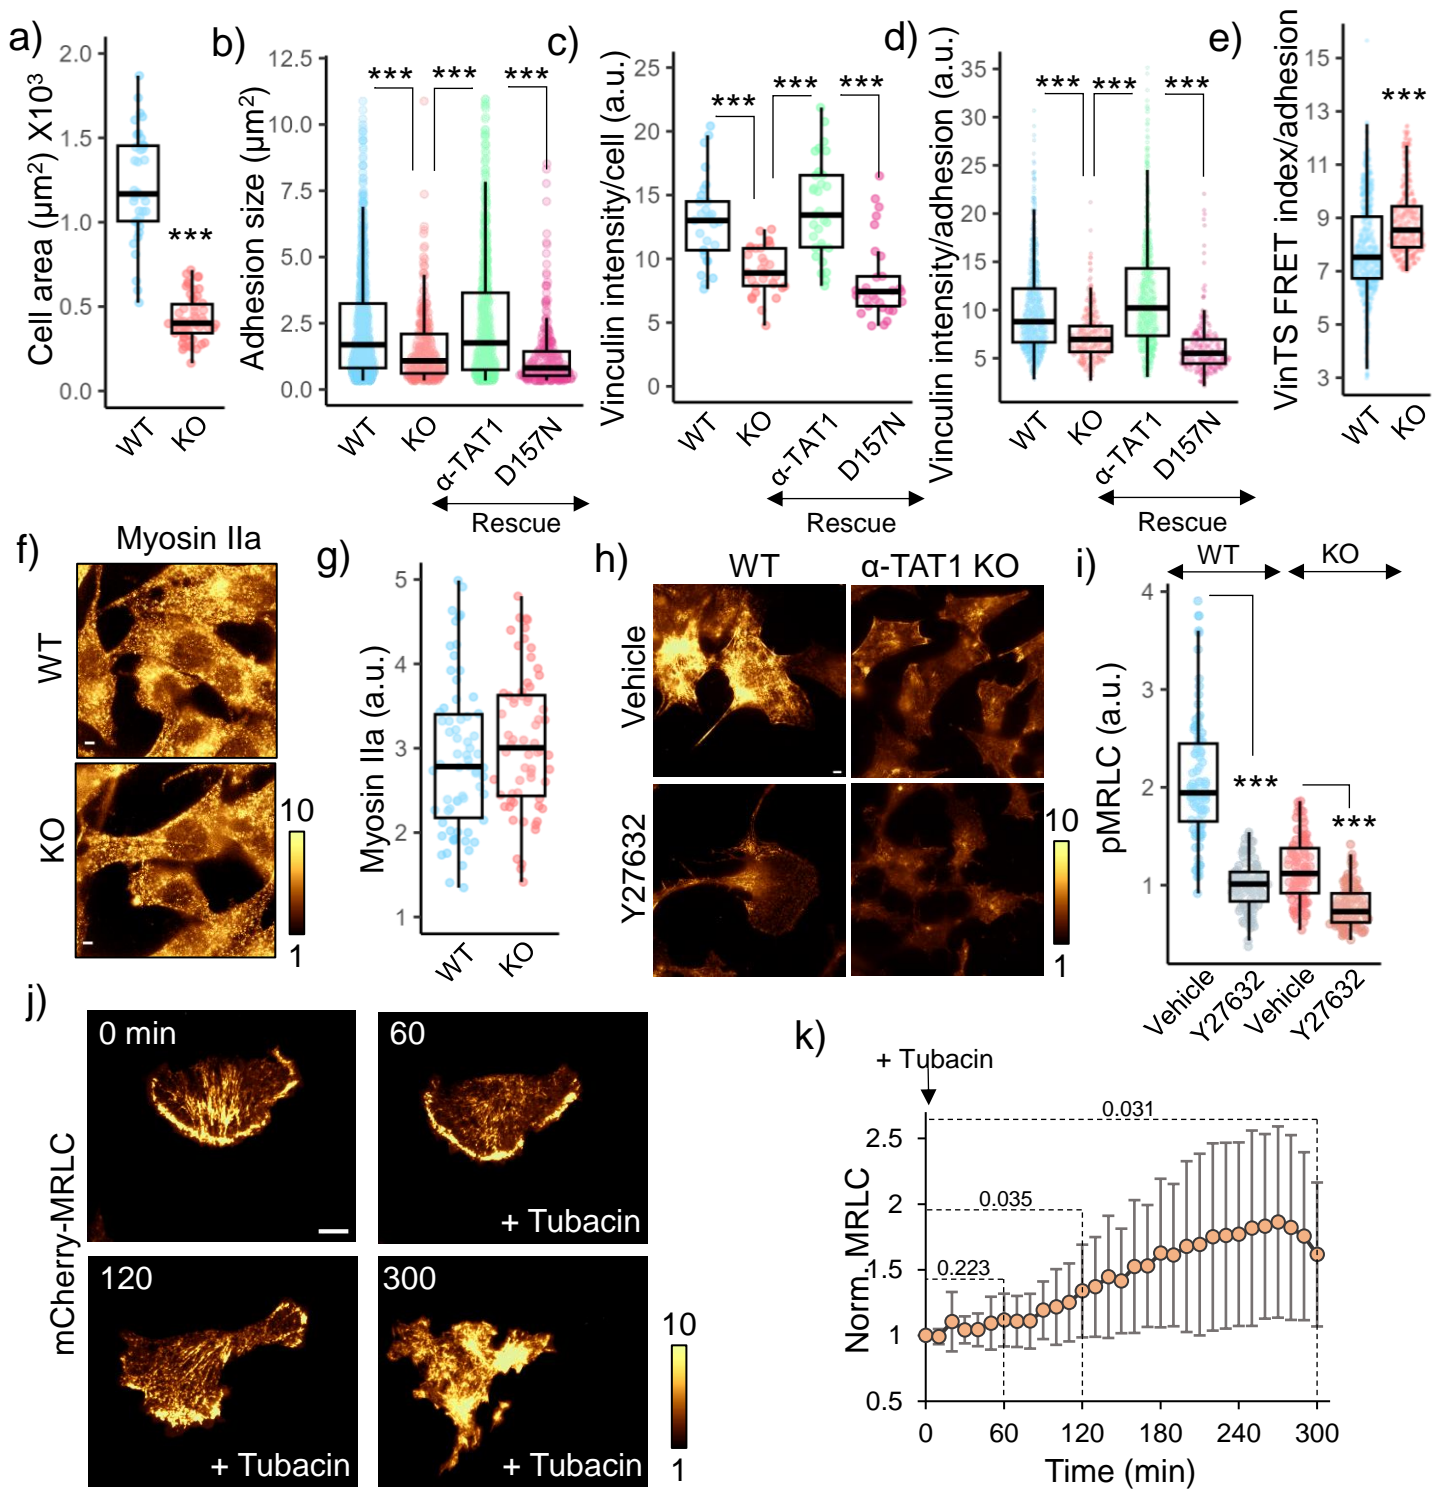

**Supplementary Figure S2.** a) Cell areas of WT and  $\alpha$ -TAT1 KO MEFs (WT: 40, KO: 54 cells); b) adhesion sizes, c) average vinculin intensity per cell, d) average vinculin intensity per adhesion in WT,  $\alpha$ -TAT1 KO, rescue-WT and rescue-D157N MEFs (WT: 20, KO: 17, rescue-WT: 16, rescue-D157N: 22 cells); e) VinTS FRET index per adhesion in WT and  $\alpha$ -TAT1 KO MEFs (WT: 18, KO: 16 cells); f), g) Myosin IIa levels in WT and  $\alpha$ -TAT1 KO MEFs (WT: 69, KO: 65 cells); h), i) Phospho-MRLC levels in WT and  $\alpha$ -TAT1 KO MEFs treated with vehicle or 10  $\mu\text{M}$  Y-27632 (WT-vehicle: 88, WT-Y27632: 91, KO-vehicle: 89, KO-Y27632: 98 cells); j) TIRF images of and k) changes in fluorescence intensity of mCherry-MRLC in WT MEFs on tubacin treatment, 12 cells, mean  $\pm$  95% C.I.; scale bar: 10  $\mu\text{m}$ . \*\*\*: p < 0.001

# Supplementary Figure 3

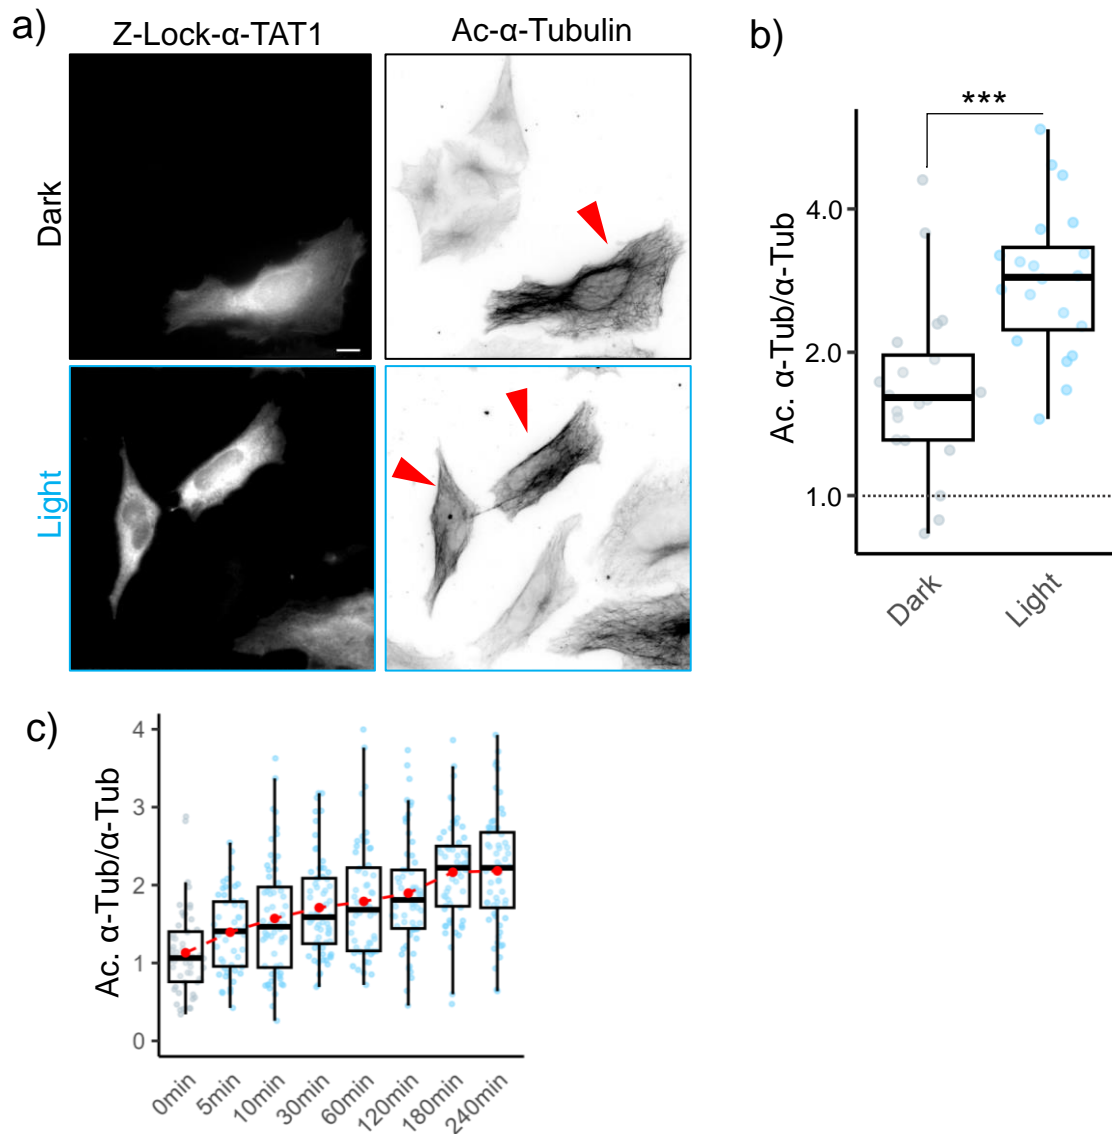

**Supplementary Figure S3.** a) Microtubule acetylation levels in HeLa cells exogenously expressing mCherry-Z-Lock- $\alpha$ -TAT1, kept in dark or exposed to blue light for 2 hours, red arrowheads indicate transfected cells; scale bar: 10  $\mu$ m; b) Microtubule acetylation levels in HeLa cells expressing mCherry-Z-Lock- $\alpha$ -TAT1 in dark or after blue light exposure, normalized against acetylation levels in non-transfected cells; c) Temporal changes in acetylated microtubules (normalized against total  $\alpha$ -Tubulin) on blue light stimulation of HeLa cells stably expressing mVenus-optoTAT V2 (0 min: 54, 5 min: 50, 10 min: 61, 30 min: 66, 60 min: 61, 120 min: 62, 180 min: 60 and 240 min: 61 cells), red dots indicate the mean values; note: time scale is not linear.

# Supplementary Figure 4

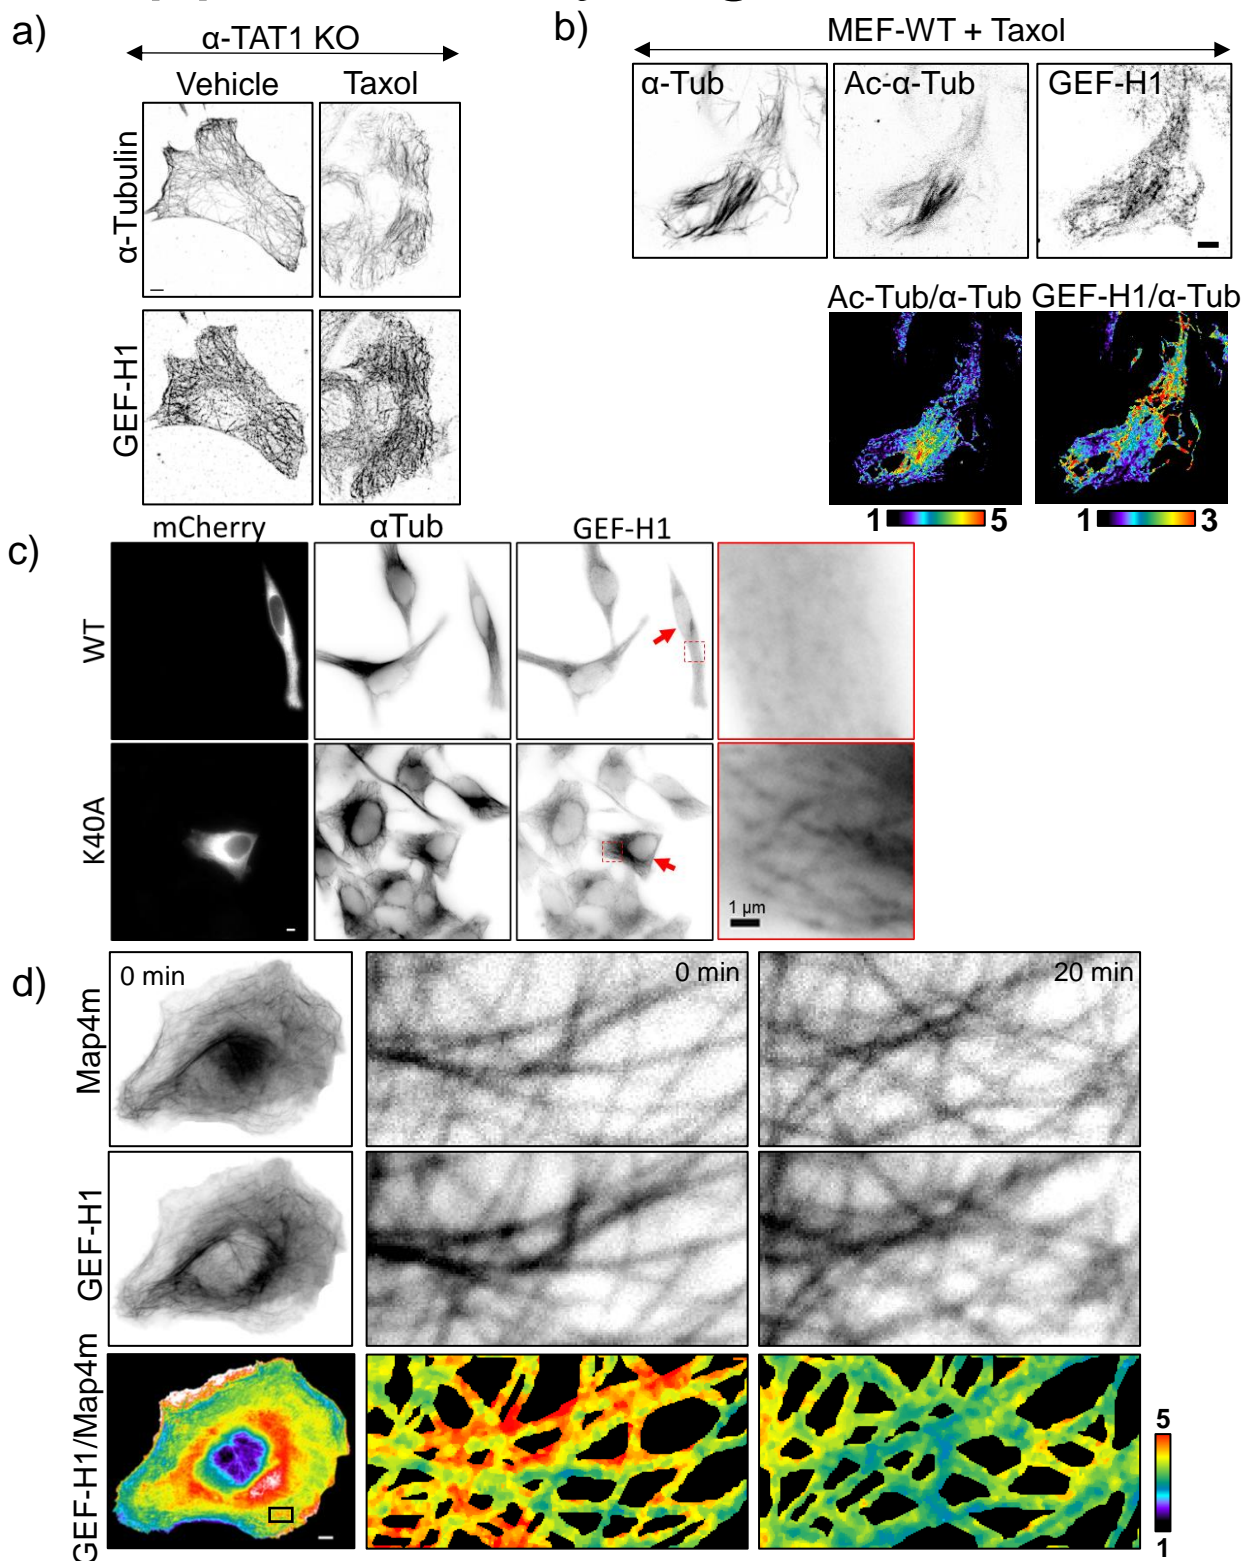

**Supplementary Figure S4.** a) Immunostaining against  $\alpha$ -Tubulin and GEF-H1  $\alpha$ -TAT1 KO MEFs treated with vehicle (DMSO) or 100 nM Taxol overnight; b) Immunostaining against  $\alpha$ -Tubulin, acetylated  $\alpha$ -Tubulin and GEF-H1 in WT MEFs treated with 100 nM Taxol overnight; c) Immunostaining against  $\alpha$ -Tubulin and GEF-H1 in HeLa cells expressing mCherry- $\alpha$ -Tubulin or mCherry- $\alpha$ -Tubulin(K40A) (lower panels), transfected cells are indicated with red arrowheads, insets are magnified on the right panel; d) Changes in mCherry-GEF-H1/mVenus-MAP4m signal in HeLa cells expressing miRFP703-optoTAT on blue light stimulation, inset is magnified in the right panels; Scale bar: 10  $\mu$ m or as indicated.

# Supplementary Figure 5

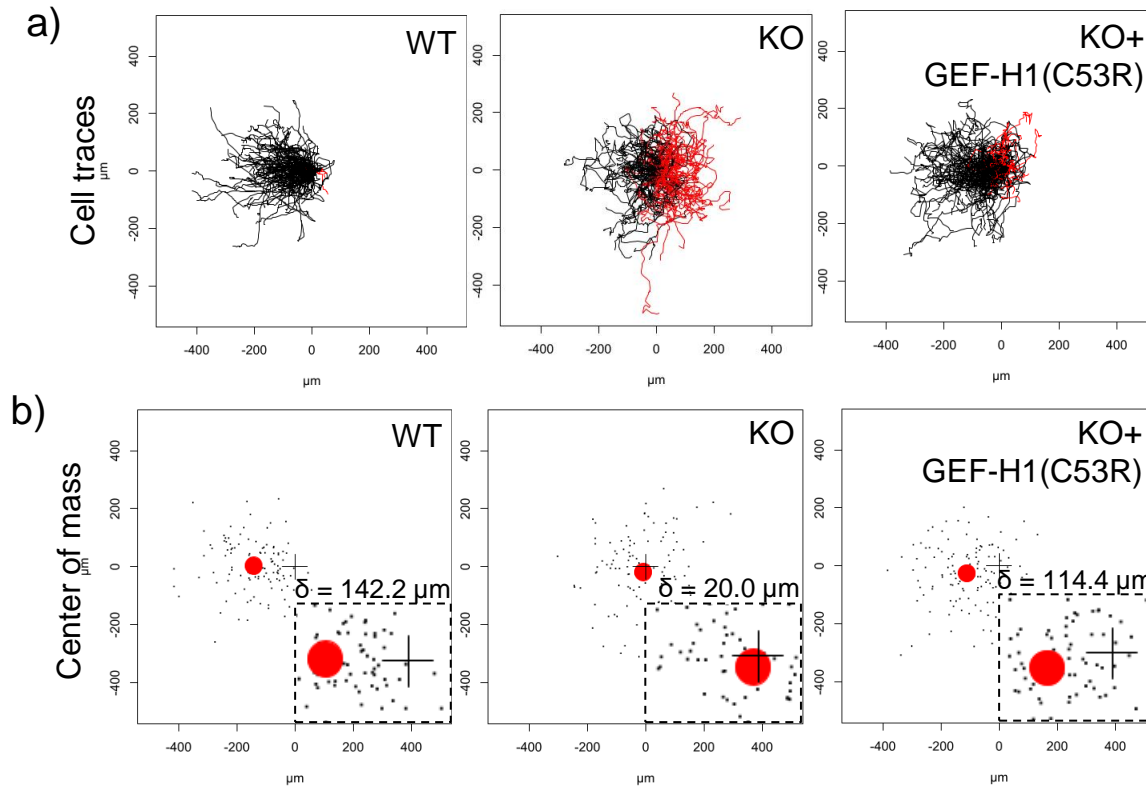

**Supplementary Figure S5.** a) Tracks of WT,  $\alpha$ -TAT1 KO and KO-rescue with mCherry-GEF-H1(C53R) MEFs in chemotaxis assay,  $n = 120$  cells (40 each from three independent experiments); b) Final location of individual cells (black dots) and the center of mass of all the cells (red circle) in chemotaxis assay, origin is indicated by “+”, distance between origin and center of mass ( $\delta$ ) is shown above the inset.
